# Supplementary material for: Retinoic Acid Upregulates METTL14 Expression and the m6A Modification Level to Inhibit the Proliferation of Embryonic Palate Mesenchymal Cells in Cleft Palate Mice
Source: MDPI journal article supplement (doi:10.3390/ijms25084538), 2024-04-20
Supplement: s1 [file s1]

Supplementary Table S1

Table S1 The specific primer sequences against the targeted genes

| Gene    | Gene ID | Sequences                              |
|---------|---------|----------------------------------------|
| METTL3  | 56335   | Forward: 5'-                           |
|         |         | AGCAGAGCAAGAGACGAATTATC-3'             |
| METTL14 | 210529  | Reverse: 5'-GGTGGAAAGAGTCGATCAGCA-3'   |
|         |         | Forward: 5'-CTGAGAGTGCGGATAGCATTG-3'   |
| FTO     | 26383   | Reverse: 5'-GAGCAGATGTATCATAGGAAGCC-3' |
|         |         | Forward: 5'-TTCATGCTGGATGACCTCAATG-3'  |
| ALKBH5  | 268420  | Reverse: 5'-GCCAACTGACAGCGTTCTAAG-3'   |
|         |         | Forward: 5'-CGCGGTCATCAACGACTACC-3'    |
| WTAP    | 60532   | Reverse: 5'-ATGGGCTTGAAGTGAAGTTG-3'    |
|         |         | Forward: 5'-GAACCTCTTCCTAAAAAGGTCCG-3' |
| GAPDH   | 14433   | Reverse: 5'-TTAACTCATCCCGTGCCATAAC-3'  |
|         |         | Forward: 5'-AGGTCGGTGTGAACGGATTG-3'    |
|         |         | Reverse: 5'-TGTAGACCATGTAGTTGAGGTCA-3' |

**Supplementary Table S2**

**Table S2 List of the antibodies used for Western blot and immunofluorescence**

| <b>Antibody name</b>                                                                   | <b>Item number</b> | <b>Manufacturer</b> |
|----------------------------------------------------------------------------------------|--------------------|---------------------|
| ki67                                                                                   | ab16667            | abcam, UK           |
| METTL14                                                                                | NBP1-81392         | NOVUS, USA          |
| Cleaved Caspase-3                                                                      | 9579S              | CST, USA            |
| phospho-mTOR                                                                           | 5536S              | CST, USA            |
| mTOR                                                                                   | 2983S              | CST, USA            |
| CyclinD1                                                                               | 2978S              | CST, USA            |
| PCNA                                                                                   | 71395SF            | CST, USA            |
| p21 Waf1/Cip1                                                                          | 2947S              | CST, USA            |
| GAPDH                                                                                  | 5171S              | CST, USA            |
| HRP- Goat anti-rabbit IgG<br>secondary antibody                                        | G1213              | Servicebio, China   |
| Anti-rabbit IgG (H+L), F(ab') <sub>2</sub><br>Fragment (Alexa Fluor® 488<br>Conjugate) | 4412S              | CST, USA            |
| Vimentin                                                                               | 5741S              | CST, USA            |
| pan-CK                                                                                 | ab264485           | abcam, UK           |
| S-100 A1                                                                               | AF0251             | Affinity, China     |

**Supplementary Table S3****Table S3 List of the antibodies used for Flow Cytometry**

| <b>Antibody name</b>               | <b>Item number</b> | <b>Manufacturer</b> |
|------------------------------------|--------------------|---------------------|
| Vimentin                           | 5741S              | CST, USA            |
| E-cadherin                         | 3195S              | CST, USA            |
| PE/Cyanine7 anti-mouse CD34        | 119325             | Biolegend, USA      |
| APC/Cyanine7 anti-mouse CD45       | 103116             | Biolegend, USA      |
| APC anti-mouse CD73                | 127209             | Biolegend, USA      |
| Alexa Fluor® 700 anti-mouse CD90.2 | 105320             | Biolegend, USA      |
| APC anti-mouse CD105               | 120413             | Biolegend, USA      |

### Supplementary Figure S1

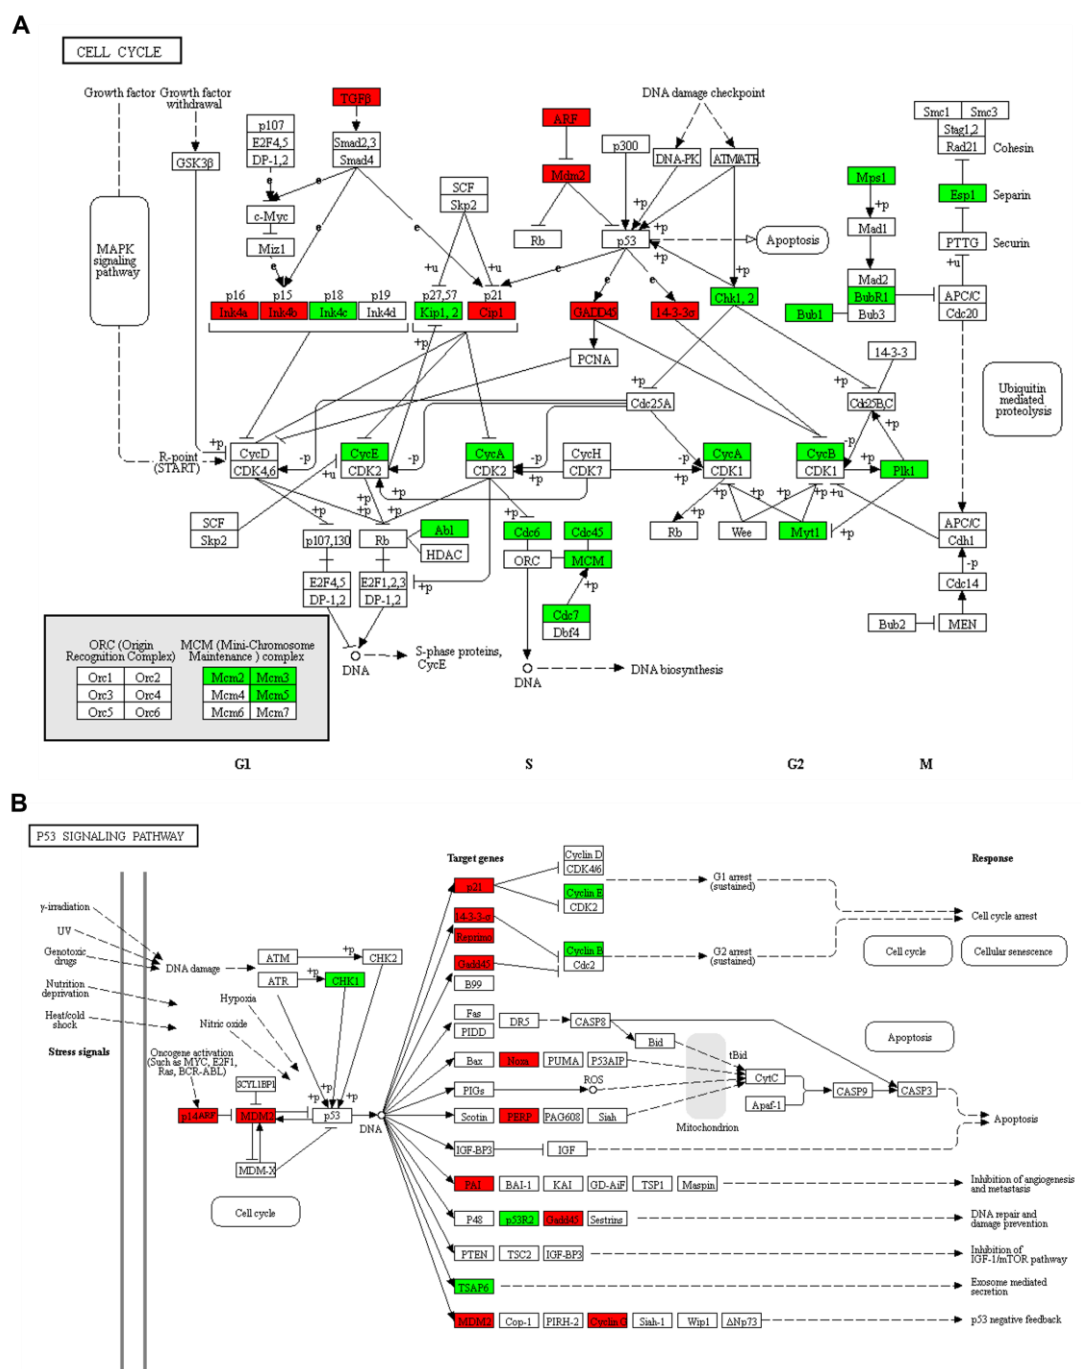

Figure S1. Schematic diagram of differentially expressed genes and enrichment pathway signal transduction in the palatal mesenchyme of embryonic mice on day E13.5 between the control group and the RA10D group. (A) Cell cycle-related signal pathway. (B)P53 signaling pathway.

# Supplementary Figure S2

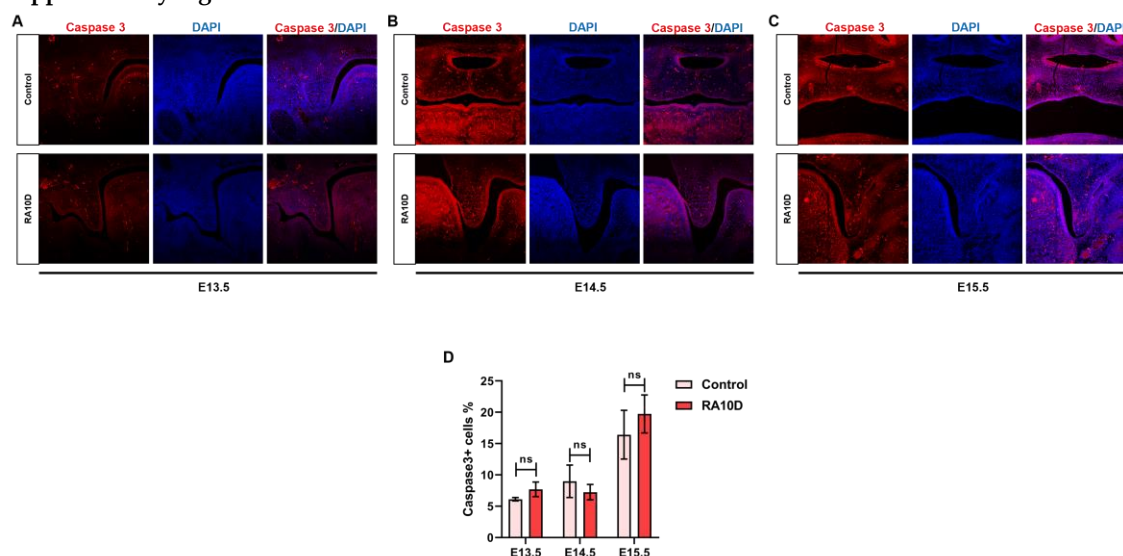

**Figure S2.** Immunofluorescence detection of apoptosis levels (cleaved-caspase 3 positive fluorescent signal rate) of palatal process mesenchyme and epithelial cells in the control group and RA10D cleft palate group in the key periods of palate development (10x magnification). (A)E13.5 day. (B)E14.5 day. (C)E15.5 day. (D)Semi-quantitative analysis of Caspase 3 immunofluorescence expression in the control group and RA10D group. n.s is considered not statistically significant, \* means  $P<0.05$ , \*\* means  $P<0.01$ , \*\*\* means  $P<0.001$ , \*\*\*\* means  $P<0.0001$ .

# Supplementary Figure S3

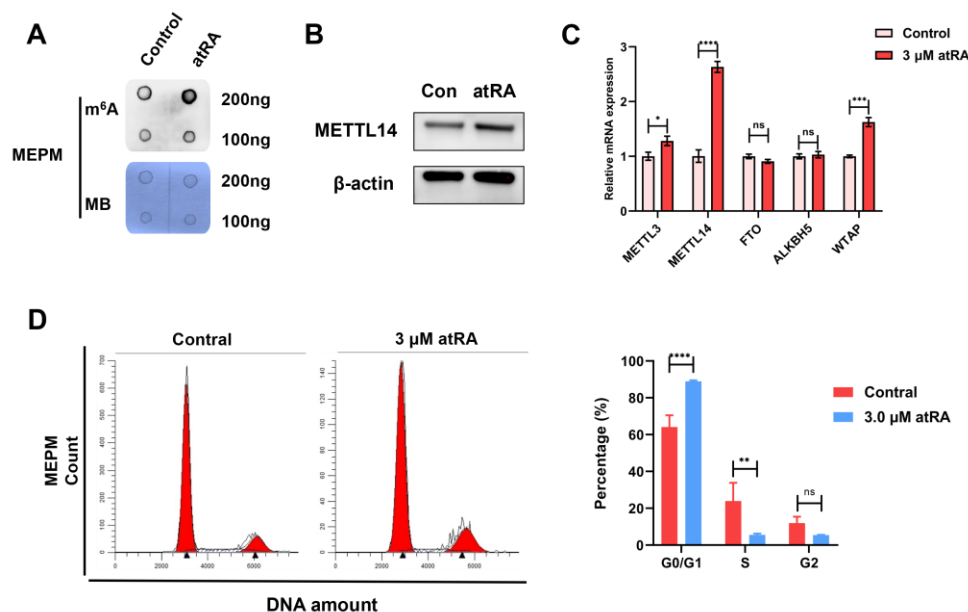

**Figure S3.** MEPM cells cultured by 3.0  $\mu$ M atRA for 48 hours showed the same phenotype and gene expression level as the palatal process mesenchyme cells of embryonic cleft palate mice. (A) Dot blotting to detect m6A methylation antibody binding level. (B) Western blot detection of METTL14 expression. (C) qRT-PCR detection of mRNA expression of m6A 'Writers' and 'Erasers'. (D) Flow cytometry to detect cell cycle. (n.s is considered not statistically significant, \* means  $P<0.05$ , \*\* means  $P<0.01$ , \*\*\* means  $P<0.001$ , \*\*\*\* means  $P<0.0001$ .)

**Supplementary Figure S4**

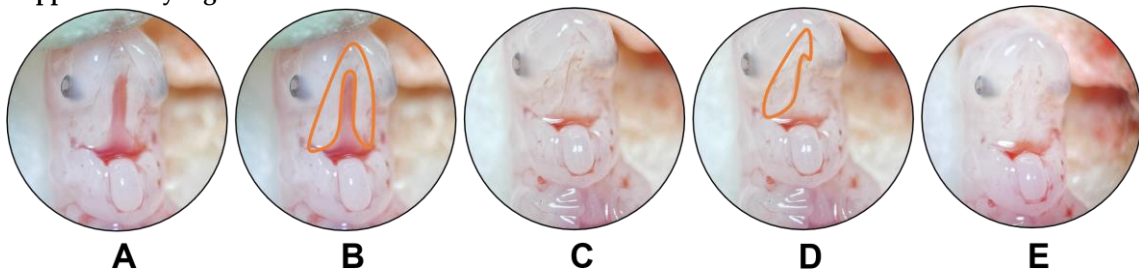

**Figure S4.**Obtaining palatal process tissue from E13.5day embryonic mice through micromanipulation. (A-B) Cutting along the angulus oris to separate the upper and lower jaws and expose the bilateral palatal processes. (C-D) Microsurgery to separate and remove the palatal processes. (E) View of the remaining tissue after the bilateral palatal processes are completely obtained.
